# Supplementary material for: Season of prescribed burns and management of an early successional species affect flower density and pollinator activity in a pine savanna ecosystem
Source: PeerJ. 2022 Nov 11;10:e14377. doi: 10.7717/peerj.14377 (PMC9661972; doi:10.7717/peerj.14377)
Supplement: Supplemental Information 2 [file peerj-10-14377-s002.csv]

Year	Julian Date	TimeSinceFire	Plot	SubPlot	Treatment1	Treatment2	TotalFlowerCount	TotalFlowerRichness	Honeybees	Bumblebees	LargeOther	SmallOther	Butterflies	Flies	Wasps	Crawling	Total Visitors	Total Pollinators_excludingFliesCrawlers	Total bees	Visitor Richness
2019	79	1038	1	1C	control	C	6	2	0	0	0	1	0	0	0	0	1	1	1	1
2019	93	1052	1	1C	control	C	42	2	0	0	0	0	0	0	0	0	0	0	0	0
2019	93	1052	1	1R	control	R	12	1	0	0	0	0	0	0	0	0	0	0	0	0
2019	107	1066	1	1C	control	C	4	1	0	0	0	0	0	0	0	0	0	0	0	0
2019	107	1066	1	1R	control	R	51	2	0	0	0	0	0	0	0	1	1	0	0	1
2019	119	1078	1	1C	control	C	6	1	0	0	0	0	0	0	0	0	0	0	0	0
2019	119	1078	1	1R	control	R	210	3	0	0	0	0	0	0	0	0	0	0	0	0
2019	135	1094	1	1R	control	R	88	2	0	0	0	0	0	0	0	6	6	0	0	1
2019	149	1108	1	1C	control	C	7	1	0	0	5	0	0	0	0	0	5	5	5	1
2019	149	1108	1	1R	control	R	75	1	0	0	0	0	0	0	0	0	0	0	0	0
2019	165	1124	1	1R	control	R	95	2	0	0	0	0	0	0	0	0	0	0	0	0
2019	177	1136	1	1C	control	C	160	2	0	0	0	0	0	0	0	0	0	0	0	0
2019	191	1150	1	1C	control	C	310	2	0	0	0	0	0	0	0	0	0	0	0	0
2019	191	1150	1	1R	control	R	129	4	0	0	0	0	0	0	0	0	0	0	0	0
2019	212	1171	1	1C	control	C	295	2	0	0	0	0	0	0	0	0	0	0	0	0
2019	212	1171	1	1R	control	R	805	2	0	0	1	0	0	0	0	0	1	1	1	1
2019	227	1186	1	1C	control	C	591	2	0	0	0	0	0	0	0	0	0	0	0	0
2019	227	1186	1	1R	control	R	377	3	0	0	0	0	0	0	0	0	0	0	0	0
2019	240	1199	1	1C	control	C	195	2	0	0	0	0	0	0	0	0	0	0	0	0
2019	240	1199	1	1R	control	R	133	4	0	0	0	0	0	0	0	0	0	0	0	0
2019	254	1213	1	1C	control	C	510	2	0	0	0	0	0	0	0	0	0	0	0	0
2019	254	1213	1	1R	control	R	563	3	0	0	0	0	0	0	0	0	0	0	0	0
2019	268	1227	1	1C	control	C	36	3	0	0	0	0	0	0	0	0	0	0	0	0
2019	268	1227	1	1R	control	R	50	1	0	0	0	0	0	0	0	0	0	0	0	0
2019	284	1243	1	1C	control	C	425	4	0	0	0	0	0	0	0	0	0	0	0	0
2019	284	1243	1	1R	control	R	190	3	0	0	0	0	2	0	0	0	2	2	0	1
2019	296	1255	1	1C	control	C	45108	3	0	0	0	0	0	0	0	0	0	0	0	0
2019	296	1255	1	1R	control	R	1515	3	0	0	0	0	0	0	0	0	0	0	0	0
2019	310	1269	1	1C	control	C	25043	3	0	0	0	0	0	0	0	1	1	0	0	1
2019	310	1269	1	1R	control	R	1035	3	0	0	0	0	0	0	0	0	0	0	0	0
2019	324	1283	1	1C	control	C	12	2	0	0	0	0	0	0	0	0	0	0	0	0
2019	324	1283	1	1R	control	R	90	3	0	0	0	0	0	0	0	0	0	0	0	0
2019	79	1038	8	8C	control	C	51	2	0	0	0	0	0	0	0	0	0	0	0	0
2019	79	1038	8	8R	control	R	63	2	0	0	0	0	0	0	0	0	0	0	0	0
2019	93	1052	8	8C	control	C	12	2	0	0	0	0	0	0	0	1	1	0	0	1
2019	93	1052	8	8R	control	R	181	2	1	0	0	0	0	0	0	1	2	1	1	2
2019	107	1066	8	8C	control	C	30	3	0	0	3	0	0	0	0	0	3	3	3	1
2019	107	1066	8	8R	control	R	380	1	2	0	1	0	0	1	0	0	4	3	3	3
2019	119	1078	8	8C	control	C	43	3	0	0	0	0	0	0	0	0	0	0	0	0
2019	119	1078	8	8R	control	R	40	1	0	0	0	0	1	1	0	1	3	1	0	3
2019	135	1094	8	8C	control	C	95	4	0	0	0	0	0	1	0	1	2	0	0	2
2019	135	1094	8	8R	control	R	11	1	0	0	0	0	1	0	0	0	1	1	0	1
2019	165	1124	8	8C	control	C	430	1	0	0	0	0	0	0	0	0	0	0	0	0
2019	165	1124	8	8R	control	R	140	1	0	0	0	0	0	0	0	0	0	0	0	0
2019	177	1136	8	8C	control	C	500	1	0	0	0	1	0	1	0	0	2	1	1	2
2019	177	1136	8	8R	control	R	350	1	0	0	0	2	0	1	0	0	3	2	2	2
2019	191	1150	8	8C	control	C	470	1	0	0	2	0	0	0	0	0	2	2	2	1
2019	191	1150	8	8R	control	R	660	1	6	0	7	0	0	0	0	0	13	13	13	2
2019	212	1171	8	8C	control	C	160	2	0	0	0	0	0	0	0	0	0	0	0	0
2019	212	1171	8	8R	control	R	2460	2	0	0	0	0	0	0	0	0	0	0	0	0
2019	227	1186	8	8C	control	C	370	2	0	0	0	0	0	0	0	0	0	0	0	0
2019	227	1186	8	8R	control	R	615	4	0	0	0	0	0	0	0	0	0	0	0	0
2019	240	1199	8	8C	control	C	10	1	0	0	0	0	0	0	0	0	0	0	0	0
2019	240	1199	8	8R	control	R	375	2	0	0	0	0	0	0	0	0	0	0	0	0
2019	254	1213	8	8C	control	C	346	3	0	0	1	0	0	0	0	0	1	1	1	1
2019	254	1213	8	8R	control	R	2558	5	0	0	0	0	0	0	1	0	1	1	0	1
2019	268	1227	8	8C	control	C	3888	1	0	0	13	0	7	0	1	11	32	21	13	4
2019	268	1227	8	8R	control	R	952	3	0	0	1	0	0	0	0	0	1	1	1	1
2019	284	1243	8	8C	control	C	5597	7	0	0	3	0	4	2	0	0	9	7	3	3
2019	284	1243	8	8R	control	R	1089	5	0	0	0	0	1	0	0	0	1	1	0	1
2019	296	1255	8	8C	control	C	127313	3	0	0	0	0	0	0	0	0	0	0	0	0
2019	296	1255	8	8R	control	R	3225	4	0	0	0	0	0	0	0	0	0	0	0	0
2019	310	1269	8	8C	control	C	6362	5	0	0	0	2	0	0	0	0	2	2	2	1
2019	310	1269	8	8R	control	R	1901	5	0	0	0	2	0	1	0	0	3	2	2	2
2019	324	1283	8	8R	control	R	215	2	0	0	0	1	0	0	0	0	1	1	1	1
2019	79	1038	10	10C	control	C	25	1	0	0	0	0	0	0	0	0	0	0	0	0
2019	79	1038	10	10R	control	R	12	2	0	0	0	0	0	0	0	0	0	0	0	0
2019	93	1052	10	10C	control	C	29	3	0	0	0	0	0	0	0	0	0	0	0	0
2019	93	1052	10	10R	control	R	61	3	0	0	0	0	1	0	0	1	2	1	0	2
2019	107	1066	10	10C	control	C	203	4	0	0	2	0	0	0	0	0	2	2	2	1
2019	107	1066	10	10R	control	R	35	2	0	0	0	0	0	0	3	0	3	3	0	1
2019	119	1078	10	10C	control	C	385	3	0	0	0	0	0	0	0	1	1	0	0	1
2019	119	1078	10	10R	control	R	15	2	0	0	0	1	0	0	0	1	2	1	1	2
2019	135	1094	10	10C	control	C	100	9	0	0	0	0	0	0	0	3	3	0	0	1
2019	135	1094	10	10R	control	R	294	2	0	0	4	6	2	1	0	11	24	12	10	5
2019	149	1108	10	10R	control	R	3	1	0	0	0	0	0	1	0	0	1	0	0	1
2019	165	1124	10	10C	control	C	110	2	0	0	0	0	0	0	3	0	3	3	0	1
2019	165	1124	10	10R	control	R	35	1	0	0	0	0	0	0	0	0	0	0	0	0
2019	177	1136	10	10C	control	C	74	2	0	0	0	0	1	0	0	0	1	1	0	1
2019	191	1150	10	10C	control	C	29	2	0	0	0	0	0	0	0	0	0	0	0	0
2019	191	1150	10	10R	control	R	563	3	0	0	0	1	0	0	0	0	1	1	1	1
2019	212	1171	10	10C	control	C	314	3	0	0	0	0	0	0	0	0	0	0	0	0
2019	212	1171	10	10R	control	R	840	2	0	0	1	0	0	0	0	0	1	1	1	1
2019	227	1186	10	10C	control	C	198	4	0	0	0	0	0	0	2	0	2	2	0	1
2019	227	1186	10	10R	control	R	547	4	0	0	0	1	0	1	0	0	2	1	1	2
2019	240	1199	10	10C	control	C	650	3	0	0	0	0	0	0	1	0	1	1	0	1
2019	240	1199	10	10R	control	R	590	2	0	0	0	0	0	0	0	0	0	0	0	0
2019	254	1213	10	10C	control	C	184	2	0	0	0	0	0	0	0	0	0	0	0	0
2019	254	1213	10	10R	control	R	1276	4	0	0	0	0	1	1	0	0	2	1	0	2
2019	268	1227	10	10C	control	C	45	5	0	0	0	0	0	0	0	0	0	0	0	0
2019	268	1227	10	10R	control	R	562	4	0	0	0	0	0	0	0	1	1	0	0	1
2019	284	1243	10	10C	control	C	3220	9	2	0	2	3	1	0	0	0	8	8	7	4
2019	284	1243	10	10R	control	R	719	6	1	0	6	5	0	2	1	0	15	13	12	5
2019	296	1255	10	10C	control	C	40209	6	0	0	0	0	0	0	0	1	1	0	0	1
2019	296	1255	10	10R	control	R	2340	3	0	0	0	0	0	0	0	0	0	0	0	0
2019	310	1269	10	10C	control	C	390	5	0	0	0	0	0	0	0	0	0	0	0	0
2019	310	1269	10	10R	control	R	753	4	0	0	0	0	0	0	0	0	0	0	0	0
2019	324	1283	10	10C	control	C	77	2	0	0	0	0	0	0	0	0	0	0	0	0
2019	324	1283	10	10R	control	R	161	2	0	0	0	0	0	3	0	0	3	0	0	1
2019	79	363	2	2R	dormant	R	2	1	0	0	0	0	0	0	0	0	0	0	0	0
2019	93	377	2	2C	dormant	C	27	1	0	0	0	0	0	0	0	1	1	0	0	1
2019	93	377	2	2R	dormant	R	40	1	0	0	0	0	0	0	0	1	1	0	0	1
2019	107	391	2	2C	dormant	C	19	2	0	0	0	0	0	0	0	2	2	0	0	1
2019	107	391	2	2R	dormant	R	16	4	0	0	0	0	0	0	0	0	0	0	0	0
2019	119	403	2	2R	dormant	R	540	2	0	0	0	0	0	0	0	0	0	0	0	0
2019	135	419	2	2R	dormant	R	96	2	0	0	0	1	1	0	0	5	7	2	1	3
2019	149	433	2	2C	dormant	C	37	2	0	0	0	0	0	0	1	0	1	1	0	1
2019	149	433	2	2R	dormant	R	233	5	0	0	0	0	0	0	0	1	1	0	0	1
2019	165	449	2	2R	dormant	R	60	3	0	0	0	0	0	0	2	0	2	2	0	1
2019	177	461	2	2R	dormant	R	215	2	0	0	3	0	0	0	0	0	3	3	3	1
2019	191	475	2	2C	dormant	C	160	1	0	0	0	0	0	0	0	0	0	0	0	0
2019	191	475	2	2R	dormant	R	591	3	0	0	0	0	0	0	0	0	0	0	0	0
2019	212	496	2	2C	dormant	C	135	1	0	0	0	0	0	0	0	0	0	0	0	0
2019	212	496	2	2R	dormant	R	797	5	0	0	0	3	0	0	0	0	3	3	3	1
2019	227	511	2	2C	dormant	C	192	4	0	0	0	0	0	0	0	0	0	0	0	0
2019	227	511	2	2R	dormant	R	1012	5	0	0	0	0	2	0	0	0	2	2	0	1
2019	240	524	2	2C	dormant	C	185	2	0	0	0	0	0	0	0	0	0	0	0	0
2019	240	524	2	2R	dormant	R	508	3	0	0	0	0	0	2	1	0	3	1	0	2
2019	254	538	2	2C	dormant	C	235	3	0	0	0	0	0	0	0	0	0	0	0	0
2019	254	538	2	2R	dormant	R	3113	3	0	2	8	0	7	5	2	4	28	19	10	6
2019	268	552	2	2C	dormant	C	26	2	0	0	0	0	0	0	0	0	0	0	0	0
2019	268	552	2	2R	dormant	R	17823	4	0	0	2	0	0	4	1	0	7	3	2	3
2019	284	568	2	2C	dormant	C	222	3	0	0	0	0	0	0	0	0	0	0	0	0
2019	284	568	2	2R	dormant	R	390	7	0	0	0	0	0	1	0	0	1	0	0	1
2019	296	580	2	2C	dormant	C	47520	2	0	0	0	0	0	0	0	0	0	0	0	0
2019	296	580	2	2R	dormant	R	3152	4	0	0	0	0	0	0	0	0	0	0	0	0
2019	310	594	2	2C	dormant	C	36	3	0	0	0	0	0	0	0	0	0	0	0	0
2019	310	594	2	2R	dormant	R	754	5	0	0	0	1	0	0	0	0	1	1	1	1
2019	324	608	2	2C	dormant	C	2	1	0	0	0	0	0	0	0	0	0	0	0	0
2019	324	608	2	2R	dormant	R	46	2	0	0	0	0	0	1	0	0	1	0	0	1
2019	79	363	7	7R	dormant	R	102	2	1	0	1	1	3	0	1	0	7	7	3	5
2019	93	377	7	7R	dormant	R	110	1	0	0	0	0	0	0	0	1	1	0	0	1
2019	107	391	7	7C	dormant	C	30	2	0	0	0	0	0	0	0	0	0	0	0	0
2019	107	391	7	7R	dormant	R	322	5	0	0	0	0	0	0	0	0	0	0	0	0
2019	119	403	7	7C	dormant	C	20	1	0	0	0	0	0	0	0	4	4	0	0	1
2019	119	403	7	7R	dormant	R	96	3	0	0	0	2	0	0	0	4	6	2	2	2
2019	135	419	7	7R	dormant	R	68	4	0	0	0	0	0	9	1	3	13	1	0	3
2019	165	449	7	7R	dormant	R	120	1	0	0	0	0	0	0	0	0	0	0	0	0
2019	177	461	7	7C	dormant	C	40	1	0	0	0	2	0	0	3	0	5	5	2	2
2019	177	461	7	7R	dormant	R	570	1	0	0	0	2	0	0	1	0	3	3	2	2
2019	191	475	7	7C	dormant	C	40	2	0	0	3	0	0	0	0	0	3	3	3	1
2019	191	475	7	7R	dormant	R	553	2	0	0	0	0	0	0	0	0	0	0	0	0
2019	212	496	7	7C	dormant	C	80	1	0	0	0	0	0	0	0	0	0	0	0	0
2019	212	496	7	7R	dormant	R	1027	4	0	0	0	0	0	0	0	0	0	0	0	0
2019	227	511	7	7C	dormant	C	277	2	0	0	0	1	0	1	0	0	2	1	1	2
2019	227	511	7	7R	dormant	R	1824	6	0	0	0	0	0	0	1	0	1	1	0	1
2019	240	524	7	7C	dormant	C	709	5	0	0	0	0	0	0	0	0	0	0	0	0
2019	240	524	7	7R	dormant	R	466	4	0	0	0	0	0	0	0	0	0	0	0	0
2019	254	538	7	7C	dormant	C	367	3	0	0	0	0	0	0	0	0	0	0	0	0
2019	254	538	7	7R	dormant	R	1384	5	0	0	0	0	1	0	0	0	1	1	0	1
2019	268	552	7	7C	dormant	C	1906	8	0	0	1	0	0	1	1	0	3	2	1	3
2019	268	552	7	7R	dormant	R	798	3	0	0	0	1	0	0	2	0	3	3	1	2
2019	284	568	7	7C	dormant	C	2992	7	0	0	1	0	0	1	0	1	3	1	1	3
2019	284	568	7	7R	dormant	R	1295	5	0	0	5	3	0	2	0	0	10	8	8	3
2019	296	580	7	7C	dormant	C	10946	6	0	0	0	0	0	0	0	0	0	0	0	0
2019	296	580	7	7R	dormant	R	5662	6	0	0	0	0	0	0	0	1	1	0	0	1
2019	310	594	7	7C	dormant	C	67	4	0	0	0	0	0	0	0	0	0	0	0	0
2019	310	594	7	7R	dormant	R	327	5	0	0	0	1	0	0	0	1	2	1	1	2
2019	324	608	7	7R	dormant	R	42	2	0	0	0	0	0	0	0	0	0	0	0	0
2019	79	363	9	9C	dormant	C	66	3	0	0	0	0	1	0	0	1	2	1	0	2
2019	79	363	9	9R	dormant	R	5	2	0	0	0	0	0	0	0	2	2	0	0	1
2019	93	377	9	9C	dormant	C	29	2	0	0	0	0	0	0	0	2	2	0	0	1
2019	93	377	9	9R	dormant	R	10	1	0	0	0	1	0	0	0	2	3	1	1	2
2019	107	391	9	9C	dormant	C	77	6	0	0	0	0	0	0	0	2	2	0	0	1
2019	107	391	9	9R	dormant	R	47	3	0	0	0	0	0	0	0	0	0	0	0	0
2019	119	403	9	9C	dormant	C	128	6	0	0	0	0	0	0	0	0	0	0	0	0
2019	119	403	9	9R	dormant	R	30	2	0	0	0	0	0	0	0	1	1	0	0	1
2019	135	419	9	9R	dormant	R	64	3	0	0	0	0	3	0	0	0	3	3	0	1
2019	165	449	9	9C	dormant	C	650	1	0	0	0	0	0	0	0	0	0	0	0	0
2019	165	449	9	9R	dormant	R	140	1	0	0	0	0	0	0	1	0	1	1	0	1
2019	177	461	9	9C	dormant	C	301	2	0	0	0	0	0	0	0	0	0	0	0	0
2019	177	461	9	9R	dormant	R	260	1	0	0	0	1	0	0	0	0	1	1	1	1
2019	191	475	9	9C	dormant	C	760	2	0	0	3	0	0	0	0	0	3	3	3	1
2019	191	475	9	9R	dormant	R	113	2	0	0	0	0	0	0	0	0	0	0	0	0
2019	212	496	9	9C	dormant	C	682	4	1	0	0	0	0	0	0	0	1	1	1	1
2019	212	496	9	9R	dormant	R	185	1	0	0	0	0	0	0	0	0	0	0	0	0
2019	227	511	9	9C	dormant	C	176	3	0	0	0	2	0	0	0	0	2	2	2	1
2019	227	511	9	9R	dormant	R	330	2	0	0	0	0	1	2	1	0	4	2	0	3
2019	240	524	9	9C	dormant	C	386	2	0	0	0	0	0	1	0	0	1	0	0	1
2019	240	524	9	9R	dormant	R	455	2	0	0	0	0	0	3	0	0	3	0	0	1
2019	254	538	9	9C	dormant	C	302	3	0	0	0	0	0	0	0	0	0	0	0	0
2019	254	538	9	9R	dormant	R	498	3	0	0	0	1	0	1	0	1	3	1	1	3
2019	268	552	9	9C	dormant	C	2005	8	0	0	1	0	0	0	0	2	3	1	1	2
2019	268	552	9	9R	dormant	R	1057	5	0	0	1	0	0	2	0	0	3	1	1	2
2019	284	568	9	9C	dormant	C	8884	8	0	0	0	0	0	0	0	0	0	0	0	0
2019	284	568	9	9R	dormant	R	1411	5	0	0	0	0	0	0	0	0	0	0	0	0
2019	296	580	9	9C	dormant	C	83149	7	0	0	0	0	2	0	0	0	2	2	0	1
2019	296	580	9	9R	dormant	R	2425	5	0	0	0	0	0	0	0	0	0	0	0	0
2019	310	594	9	9C	dormant	C	669	8	0	0	0	0	0	0	0	0	0	0	0	0
2019	310	594	9	9R	dormant	R	409	4	0	0	0	1	0	0	0	0	1	1	1	1
2019	324	608	9	9C	dormant	C	245	3	0	0	0	0	0	1	0	1	2	0	0	2
2019	324	608	9	9R	dormant	R	170	3	0	0	0	0	0	0	0	3	3	0	0	1
2019	79	216	4	4C	growing	C	13	2	0	0	0	0	0	0	0	0	0	0	0	0
2019	79	216	4	4R	growing	R	500	1	0	0	0	0	0	0	0	0	0	0	0	0
2019	93	230	4	4C	growing	C	115	2	0	0	0	0	0	0	0	0	0	0	0	0
2019	93	230	4	4R	growing	R	375	2	0	0	0	1	0	0	0	0	1	1	1	1
2019	107	244	4	4C	growing	C	201	2	0	0	0	2	0	0	0	2	4	2	2	2
2019	107	244	4	4R	growing	R	396	2	0	0	5	0	0	0	0	0	5	5	5	1
2019	119	256	4	4R	growing	R	19	3	0	0	0	0	0	0	0	0	0	0	0	0
2019	135	272	4	4C	growing	C	153	1	0	0	0	0	0	0	1	0	1	1	0	1
2019	149	286	4	4C	growing	C	126	2	0	0	1	0	0	0	2	0	3	3	1	2
2019	149	286	4	4R	growing	R	75	1	0	0	0	0	0	1	2	0	3	2	0	2
2019	165	302	4	4C	growing	C	110	1	0	0	0	0	0	0	0	0	0	0	0	0
2019	165	302	4	4R	growing	R	203	2	0	0	0	1	2	0	0	0	3	3	1	2
2019	177	314	4	4C	growing	C	750	2	0	0	0	0	0	0	0	0	0	0	0	0
2019	177	314	4	4R	growing	R	600	1	0	0	0	0	0	0	0	0	0	0	0	0
2019	191	328	4	4C	growing	C	210	1	0	0	0	0	0	0	0	0	0	0	0	0
2019	191	328	4	4R	growing	R	430	1	0	0	0	1	0	0	0	0	1	1	1	1
2019	212	349	4	4C	growing	C	680	2	0	0	0	0	0	0	0	0	0	0	0	0
2019	227	364	4	4C	growing	C	301	3	0	0	0	0	0	0	1	0	1	1	0	1
2019	227	364	4	4R	growing	R	72	2	0	0	0	0	0	0	0	0	0	0	0	0
2019	240	377	4	4C	growing	C	180	2	0	9	0	0	0	0	0	0	9	9	9	1
2019	240	377	4	4R	growing	R	37	3	0	0	0	0	0	0	0	0	0	0	0	0
2019	254	391	4	4C	growing	C	124	5	0	2	0	0	0	0	0	7	9	2	2	2
2019	254	391	4	4R	growing	R	960	2	0	5	0	3	0	0	0	0	8	8	8	2
2019	268	405	4	4C	growing	C	847	4	0	1	0	0	1	0	0	1	3	2	1	3
2019	268	405	4	4R	growing	R	137	5	0	1	0	0	0	0	3	1	5	4	1	3
2019	284	421	4	4C	growing	C	3525	5	0	0	0	0	0	0	0	0	0	0	0	0
2019	284	421	4	4R	growing	R	174	5	0	0	0	0	0	0	0	0	0	0	0	0
2019	296	433	4	4C	growing	C	56636	5	0	0	0	0	0	0	0	0	0	0	0	0
2019	296	433	4	4R	growing	R	140	5	0	0	0	0	0	0	0	0	0	0	0	0
2019	310	447	4	4C	growing	C	52139	4	0	0	0	0	0	0	0	0	0	0	0	0
2019	310	447	4	4R	growing	R	179	4	0	0	0	0	0	0	0	0	0	0	0	0
2019	324	461	4	4C	growing	C	33	2	0	0	0	0	0	0	0	0	0	0	0	0
2019	324	461	4	4R	growing	R	4	1	0	0	0	0	0	0	0	0	0	0	0	0
2019	79	216	6	6R	growing	R	61	2	0	0	0	0	0	0	0	0	0	0	0	0
2019	93	230	6	6R	growing	R	53	3	0	0	0	0	0	0	0	1	1	0	0	1
2019	107	244	6	6C	growing	C	4	1	0	0	0	0	0	0	0	0	0	0	0	0
2019	107	244	6	6R	growing	R	75	3	0	0	0	0	0	0	0	1	1	0	0	1
2019	119	256	6	6C	growing	C	15	3	0	0	0	0	0	0	0	0	0	0	0	0
2019	135	272	6	6C	growing	C	101	3	0	0	0	0	0	0	0	10	10	0	0	1
2019	165	302	6	6C	growing	C	75	1	0	0	0	0	0	0	0	1	1	0	0	1
2019	165	302	6	6R	growing	R	100	1	0	0	0	0	0	1	0	0	1	0	0	1
2019	177	314	6	6C	growing	C	600	1	0	0	0	0	0	0	0	1	1	0	0	1
2019	177	314	6	6R	growing	R	85	1	0	0	0	7	0	0	0	0	7	7	7	1
2019	191	328	6	6C	growing	C	405	3	0	0	0	0	0	0	5	0	5	5	0	1
2019	191	328	6	6R	growing	R	660	2	0	0	0	0	0	0	1	0	1	1	0	1
2019	212	349	6	6C	growing	C	1902	2	0	0	0	0	0	1	3	0	4	3	0	2
2019	212	349	6	6R	growing	R	385	1	0	0	0	0	0	2	7	0	9	7	0	2
2019	227	364	6	6C	growing	C	755	2	0	0	0	0	0	2	1	0	3	1	0	2
2019	227	364	6	6R	growing	R	1285	2	0	0	0	0	0	0	4	0	4	4	0	1
2019	240	377	6	6C	growing	C	705	2	0	0	0	0	0	0	3	0	3	3	0	1
2019	240	377	6	6R	growing	R	480	2	0	0	0	0	0	0	3	0	3	3	0	1
2019	254	391	6	6C	growing	C	907	3	0	0	0	0	0	0	0	0	0	0	0	0
2019	254	391	6	6R	growing	R	881	5	0	0	1	0	1	0	0	5	7	2	1	3
2019	268	405	6	6C	growing	C	348	5	0	0	0	1	0	0	0	0	1	1	1	1
2019	268	405	6	6R	growing	R	5720	4	0	0	0	3	3	1	1	4	12	7	3	5
2019	284	421	6	6C	growing	C	1180	5	0	0	0	0	0	0	1	0	1	1	0	1
2019	284	421	6	6R	growing	R	1435	6	0	0	0	0	1	0	1	0	2	2	0	2
2019	296	433	6	6C	growing	C	352976	3	0	0	0	1	0	3	0	0	4	1	1	2
2019	296	433	6	6R	growing	R	149223	3	0	0	0	0	6	5	0	0	11	6	0	2
2019	310	447	6	6C	growing	C	305	3	0	0	0	0	0	0	0	0	0	0	0	0
2019	310	447	6	6R	growing	R	686	5	0	0	0	4	0	1	0	0	5	4	4	2
2019	324	461	6	6C	growing	C	90	2	0	0	0	1	0	0	0	0	1	1	1	1
2019	324	461	6	6R	growing	R	855	2	0	0	0	0	0	2	0	0	2	0	0	1
2019	79	216	11	11C	growing	C	110	3	0	0	0	0	0	0	0	0	0	0	0	0
2019	79	216	11	11R	growing	R	229	4	0	0	0	1	1	0	0	0	2	2	1	2
2019	93	230	11	11C	growing	C	30	1	0	0	0	0	0	0	0	0	0	0	0	0
2019	93	230	11	11R	growing	R	43	4	0	0	0	0	0	0	1	3	4	1	0	2
2019	107	244	11	11C	growing	C	103	5	0	0	0	0	0	0	0	0	0	0	0	0
2019	107	244	11	11R	growing	R	82	5	0	0	0	0	0	0	0	0	0	0	0	0
2019	119	256	11	11C	growing	C	111	5	0	0	0	0	0	1	0	0	1	0	0	1
2019	119	256	11	11R	growing	R	33	5	0	0	0	1	0	0	0	0	1	1	1	1
2019	135	272	11	11R	growing	R	5	1	0	0	1	0	0	0	0	0	1	1	1	1
2019	149	286	11	11R	growing	R	283	2	0	0	2	11	5	1	3	0	22	21	13	5
2019	165	302	11	11C	growing	C	70	1	0	0	0	0	0	0	0	0	0	0	0	0
2019	165	302	11	11R	growing	R	350	1	0	0	6	0	0	0	1	0	7	7	6	2
2019	177	314	11	11C	growing	C	100	1	0	0	0	1	0	0	0	0	1	1	1	1
2019	177	314	11	11R	growing	R	800	1	0	0	0	0	0	0	0	0	0	0	0	0
2019	191	328	11	11C	growing	C	250	1	0	0	15	3	0	0	0	0	18	18	18	2
2019	191	328	11	11R	growing	R	790	1	11	0	0	0	0	0	0	0	11	11	11	1
2019	212	349	11	11C	growing	C	791	3	0	0	0	0	1	0	0	0	1	1	0	1
2019	212	349	11	11R	growing	R	983	4	0	0	0	0	0	0	0	0	0	0	0	0
2019	227	364	11	11C	growing	C	650	1	0	0	0	0	0	2	0	0	2	0	0	1
2019	240	377	11	11C	growing	C	502	3	0	0	0	0	0	0	0	0	0	0	0	0
2019	240	377	11	11R	growing	R	146	2	0	0	0	0	0	0	0	0	0	0	0	0
2019	254	391	11	11C	growing	C	55	2	0	0	0	0	0	0	0	0	0	0	0	0
2019	254	391	11	11R	growing	R	1973	7	0	0	0	0	2	0	1	1	4	3	0	3
2019	268	405	11	11C	growing	C	1793	5	2	0	3	0	4	7	1	1	18	10	5	6
2019	268	405	11	11R	growing	R	2455	6	15	0	4	0	5	5	0	0	29	24	19	4
2019	284	421	11	11C	growing	C	32350	6	0	0	0	0	0	1	0	0	1	0	0	1
2019	284	421	11	11R	growing	R	22195	5	0	0	0	0	1	0	0	4	5	1	0	2
2019	296	433	11	11C	growing	C	64572	4	0	0	0	0	0	0	0	0	0	0	0	0
2019	296	433	11	11R	growing	R	43587	4	0	0	0	0	0	0	0	1	1	0	0	1
2019	310	447	11	11C	growing	C	511	4	0	0	0	1	0	0	0	0	1	1	1	1
2019	310	447	11	11R	growing	R	956	4	0	0	2	5	0	0	0	0	7	7	7	2
2019	324	461	11	11C	growing	C	342	2	0	0	0	0	0	0	0	0	0	0	0	0
2019	324	461	11	11R	growing	R	276	3	0	0	0	0	0	1	0	0	1	0	0	1
2019	79	299	3	3C	transition	C	25	1	0	0	0	0	0	1	0	0	1	0	0	1
2019	93	313	3	3C	transition	C	26	2	0	0	0	0	0	0	0	0	0	0	0	0
2019	93	313	3	3R	transition	R	15	1	0	0	0	0	0	0	0	0	0	0	0	0
2019	107	327	3	3C	transition	C	79	3	0	0	0	0	0	0	0	2	2	0	0	1
2019	107	327	3	3R	transition	R	76	3	0	0	0	0	0	0	0	0	0	0	0	0
2019	149	369	3	3C	transition	C	2	1	0	0	1	0	0	0	0	0	1	1	1	1
2019	177	397	3	3C	transition	C	354	3	0	0	0	0	0	0	0	0	0	0	0	0
2019	177	397	3	3R	transition	R	22	2	0	0	0	0	0	0	0	0	0	0	0	0
2019	191	411	3	3C	transition	C	590	5	0	0	0	1	0	1	0	0	2	1	1	2
2019	191	411	3	3R	transition	R	57	4	0	0	0	1	0	0	0	0	1	1	1	1
2019	212	432	3	3C	transition	C	914	4	0	0	0	0	0	0	0	0	0	0	0	0
2019	212	432	3	3R	transition	R	100	2	0	0	0	0	0	0	0	0	0	0	0	0
2019	227	447	3	3C	transition	C	1083	4	0	0	0	1	0	1	0	0	2	1	1	2
2019	227	447	3	3R	transition	R	52	2	0	0	0	0	0	0	0	0	0	0	0	0
2019	240	460	3	3C	transition	C	475	3	0	0	0	0	0	3	0	1	4	0	0	2
2019	240	460	3	3R	transition	R	87	4	0	0	0	0	1	0	0	0	1	1	0	1
2019	254	474	3	3C	transition	C	896	3	0	0	0	0	0	0	0	0	0	0	0	0
2019	254	474	3	3R	transition	R	146	3	0	0	0	0	0	0	0	0	0	0	0	0
2019	268	488	3	3C	transition	C	140	1	0	0	0	0	0	0	0	0	0	0	0	0
2019	268	488	3	3R	transition	R	40	2	0	0	0	0	0	0	0	0	0	0	0	0
2019	284	504	3	3C	transition	C	515	2	0	0	0	0	0	0	0	0	0	0	0	0
2019	284	504	3	3R	transition	R	35	1	0	0	0	0	0	0	0	0	0	0	0	0
2019	296	516	3	3C	transition	C	74236	3	0	0	0	0	0	0	0	0	0	0	0	0
2019	296	516	3	3R	transition	R	21	2	0	0	0	0	0	0	0	0	0	0	0	0
2019	310	530	3	3C	transition	C	57075	2	0	0	0	0	0	1	0	0	1	0	0	1
2019	310	530	3	3R	transition	R	200	1	0	0	0	0	0	0	0	0	0	0	0	0
2019	79	299	5	5C	transition	C	97	2	0	0	0	0	0	0	0	0	0	0	0	0
2019	79	299	5	5R	transition	R	3	2	0	0	0	0	0	0	0	0	0	0	0	0
2019	93	313	5	5C	transition	C	60	1	0	0	0	0	1	1	0	0	2	1	0	2
2019	93	313	5	5R	transition	R	35	2	0	0	0	0	0	0	0	0	0	0	0	0
2019	107	327	5	5C	transition	C	245	2	0	0	2	0	0	1	0	0	3	2	2	2
2019	107	327	5	5R	transition	R	110	2	0	0	0	0	0	2	0	0	2	0	0	1
2019	119	339	5	5C	transition	C	107	3	2	0	0	0	0	0	0	1	3	2	2	2
2019	119	339	5	5R	transition	R	2835	3	0	0	0	2	0	1	5	0	8	7	2	3
2019	135	355	5	5C	transition	C	12	2	0	0	0	0	0	0	0	0	0	0	0	0
2019	135	355	5	5R	transition	R	11	4	0	0	0	0	1	0	0	1	2	1	0	2
2019	149	369	5	5C	transition	C	60	1	0	0	0	6	0	0	0	2	8	6	6	2
2019	149	369	5	5R	transition	R	45	2	0	0	0	0	0	0	0	0	0	0	0	0
2019	165	385	5	5C	transition	C	120	1	0	0	0	0	0	0	0	0	0	0	0	0
2019	165	385	5	5R	transition	R	390	1	0	0	0	2	0	0	1	0	3	3	2	2
2019	177	397	5	5C	transition	C	3200	1	0	0	0	0	0	0	0	0	0	0	0	0
2019	177	397	5	5R	transition	R	2700	2	0	0	0	1	0	2	0	0	3	1	1	2
2019	191	411	5	5C	transition	C	510	1	7	0	0	0	0	0	0	0	7	7	7	1
2019	191	411	5	5R	transition	R	439	2	0	0	0	0	0	0	0	0	0	0	0	0
2019	212	432	5	5C	transition	C	1350	1	0	0	0	0	0	0	0	0	0	0	0	0
2019	212	432	5	5R	transition	R	1429	5	0	0	0	0	0	0	0	0	0	0	0	0
2019	227	447	5	5C	transition	C	260	2	0	0	0	0	0	0	0	0	0	0	0	0
2019	227	447	5	5R	transition	R	820	3	0	0	0	0	1	0	4	0	5	5	0	2
2019	240	460	5	5C	transition	C	10	1	0	0	0	0	0	0	0	0	0	0	0	0
2019	240	460	5	5R	transition	R	1150	2	0	0	1	1	4	0	15	0	21	21	2	4
2019	254	474	5	5C	transition	C	63	3	0	0	0	0	0	0	0	0	0	0	0	0
2019	254	474	5	5R	transition	R	24220	3	0	0	16	0	12	5	5	0	38	33	16	4
2019	268	488	5	5C	transition	C	493	3	0	0	0	1	0	0	0	0	1	1	1	1
2019	268	488	5	5R	transition	R	23192	3	2	0	1	0	1	3	1	1	9	5	3	6
2019	284	504	5	5C	transition	C	1685	3	0	0	2	5	3	0	1	0	11	11	7	4
2019	284	504	5	5R	transition	R	312	4	0	0	0	0	0	1	0	0	1	0	0	1
2019	296	516	5	5C	transition	C	31159	4	0	0	0	0	0	0	0	0	0	0	0	0
2019	296	516	5	5R	transition	R	3896	4	0	0	0	0	0	0	0	0	0	0	0	0
2019	310	530	5	5C	transition	C	31381	5	0	0	0	0	0	0	0	0	0	0	0	0
2019	310	530	5	5R	transition	R	2000	4	0	0	0	0	0	0	0	0	0	0	0	0
2019	324	544	5	5C	transition	C	50	4	0	0	1	0	0	0	0	0	1	1	1	1
2019	324	544	5	5R	transition	R	230	3	0	0	0	0	0	12	0	0	12	0	0	1
2019	79	299	12	12C	transition	C	35	3	0	0	0	0	0	0	0	1	1	0	0	1
2019	79	299	12	12R	transition	R	20	2	0	0	0	0	0	0	0	0	0	0	0	0
2019	93	313	12	12C	transition	C	43	4	0	0	0	0	0	1	0	0	1	0	0	1
2019	93	313	12	12R	transition	R	36	2	0	0	0	0	0	0	0	2	2	0	0	1
2019	107	327	12	12C	transition	C	31	3	0	0	0	0	0	1	0	0	1	0	0	1
2019	107	327	12	12R	transition	R	36	3	0	1	1	0	0	2	0	0	4	2	2	3
2019	119	339	12	12C	transition	C	61	4	0	0	0	0	0	0	0	5	5	0	0	1
2019	119	339	12	12R	transition	R	242	3	0	0	0	1	0	0	0	9	10	1	1	2
2019	135	355	12	12C	transition	C	7	1	0	0	0	0	0	2	0	0	2	0	0	1
2019	149	369	12	12C	transition	C	2	1	0	0	0	0	0	0	0	0	0	0	0	0
2019	165	385	12	12C	transition	C	171	2	0	0	0	0	0	0	1	0	1	1	0	1
2019	165	385	12	12R	transition	R	361	2	0	0	1	1	0	1	0	0	3	2	2	3
2019	177	397	12	12C	transition	C	270	1	0	0	0	0	0	0	0	0	0	0	0	0
2019	177	397	12	12R	transition	R	640	1	0	0	0	4	0	0	0	0	4	4	4	1
2019	191	411	12	12C	transition	C	370	2	0	0	0	0	0	0	0	0	0	0	0	0
2019	191	411	12	12R	transition	R	984	2	2	0	6	0	0	0	0	0	8	8	8	2
2019	212	432	12	12C	transition	C	1177	3	0	0	0	0	0	0	0	0	0	0	0	0
2019	212	432	12	12R	transition	R	912	4	0	0	1	0	0	0	0	0	1	1	1	1
2019	227	447	12	12C	transition	C	858	4	0	0	0	0	0	0	1	2	3	1	0	2
2019	227	447	12	12R	transition	R	585	1	0	0	0	0	0	0	4	1	5	4	0	2
2019	240	460	12	12C	transition	C	875	2	0	0	0	0	0	0	0	0	0	0	0	0
2019	240	460	12	12R	transition	R	740	1	0	0	0	0	0	0	1	4	5	1	0	2
2019	254	474	12	12C	transition	C	2682	6	0	0	0	0	2	0	3	1	6	5	0	3
2019	254	474	12	12R	transition	R	2077	3	0	0	2	0	6	5	1	1	15	9	2	5
2019	268	488	12	12C	transition	C	4395	5	0	0	1	0	2	7	0	0	10	3	1	3
2019	268	488	12	12R	transition	R	2842	5	0	3	0	1	2	0	1	11	18	7	4	5
2019	284	504	12	12C	transition	C	758	8	0	0	0	0	0	1	0	5	6	0	0	2
2019	284	504	12	12R	transition	R	7823	5	0	0	0	0	0	0	0	0	0	0	0	0
2019	296	516	12	12C	transition	C	2805	5	0	0	0	0	0	0	0	1	1	0	0	1
2019	296	516	12	12R	transition	R	2601	5	0	0	0	5	0	0	1	0	6	6	5	2
2019	310	530	12	12C	transition	C	355	4	0	0	0	3	4	2	1	0	10	8	3	4
2019	310	530	12	12R	transition	R	961	3	0	3	2	0	1	0	2	2	10	8	5	5
2019	324	544	12	12C	transition	C	377	4	0	0	0	0	0	0	0	0	0	0	0	0
2019	324	544	12	12R	transition	R	183	3	0	0	0	0	0	0	0	0	0	0	0	0
2020	83	1407	1	1R	control	R	13	4	0	0	0	0	0	0	0	0	0	0	0	0
2020	99	1423	1	1C	control	C	1	1	0	0	0	0	0	0	0	0	0	0	0	0
2020	99	1423	1	1R	control	R	2893	3	0	3	0	0	0	0	1	1	5	4	3	3
2020	113	1437	1	1C	control	C	2	1	0	0	0	0	0	0	0	0	0	0	0	0
2020	113	1437	1	1R	control	R	1112	3	0	3	0	0	2	0	0	3	8	5	3	3
2020	126	1450	1	1R	control	R	13	4	0	0	3	5	0	0	0	0	8	8	8	2
2020	140	1464	1	1C	control	C	1	1	0	0	0	0	0	0	0	0	0	0	0	0
2020	154	1478	1	1C	control	C	15	1	0	0	0	0	0	0	0	0	0	0	0	0
2020	154	1478	1	1R	control	R	60	2	0	0	0	0	0	0	0	1	1	0	0	1
2020	168	1492	1	1C	control	C	154	2	0	0	0	0	0	0	0	0	0	0	0	0
2020	168	1492	1	1R	control	R	21	1	0	0	0	4	0	0	0	0	4	4	4	1
2020	182	1506	1	1C	control	C	383	2	0	0	0	0	0	0	0	0	0	0	0	0
2020	182	1506	1	1R	control	R	318	4	0	0	0	0	0	0	0	0	0	0	0	0
2020	195	1519	1	1C	control	C	258	3	0	0	0	1	0	0	0	1	2	1	1	2
2020	195	1519	1	1R	control	R	378	4	0	0	0	0	0	0	0	0	0	0	0	0
2020	213	1537	1	1C	control	C	271	3	0	0	0	1	0	5	3	2	11	4	1	4
2020	213	1537	1	1R	control	R	590	1	0	0	0	0	0	1	0	5	6	0	0	2
2020	223	1547	1	1C	control	C	240	1	0	0	0	0	0	0	0	0	0	0	0	0
2020	223	1547	1	1R	control	R	182	2	0	0	0	0	0	2	0	1	3	0	0	2
2020	238	1562	1	1C	control	C	648	2	0	0	0	0	0	0	0	0	0	0	0	0
2020	238	1562	1	1R	control	R	640	2	0	0	0	0	0	0	0	0	0	0	0	0
2020	252	1576	1	1C	control	C	180	1	0	0	0	0	0	0	0	0	0	0	0	0
2020	252	1576	1	1R	control	R	189	2	0	0	0	0	0	0	0	0	0	0	0	0
2020	266	1590	1	1C	control	C	272	4	0	0	0	0	0	0	0	0	0	0	0	0
2020	266	1590	1	1R	control	R	267	3	0	0	0	0	0	0	0	0	0	0	0	0
2020	280	1604	1	1C	control	C	109	6	0	0	1	0	0	0	0	0	1	1	1	1
2020	280	1604	1	1R	control	R	288	6	0	0	0	0	0	0	0	3	3	0	0	1
2020	295	1619	1	1C	control	C	16558	6	0	0	0	0	0	0	0	1	1	0	0	1
2020	295	1619	1	1R	control	R	5731	4	0	0	0	0	0	0	0	0	0	0	0	0
2020	309	1633	1	1C	control	C	503	3	0	0	0	2	0	0	0	1	3	2	2	2
2020	309	1633	1	1R	control	R	559	4	0	0	0	0	0	0	0	0	0	0	0	0
2020	322	1646	1	1C	control	C	2164	3	0	0	0	0	0	0	0	0	0	0	0	0
2020	322	1646	1	1R	control	R	53	3	0	0	0	0	0	0	0	0	0	0	0	0
2020	69	1393	8	8R	control	R	6	2	0	0	0	0	0	0	0	0	0	0	0	0
2020	83	1407	8	8R	control	R	13	2	0	0	0	0	0	0	0	0	0	0	0	0
2020	99	1423	8	8C	control	C	16	2	0	0	0	0	1	0	0	0	1	1	0	1
2020	99	1423	8	8R	control	R	191	4	1	0	0	0	0	0	0	0	1	1	1	1
2020	113	1437	8	8C	control	C	65	3	0	0	0	0	0	0	0	1	1	0	0	1
2020	113	1437	8	8R	control	R	93	2	0	0	1	2	0	0	0	7	10	3	3	3
2020	126	1450	8	8C	control	C	285	4	0	0	5	0	0	15	0	3	23	5	5	3
2020	126	1450	8	8R	control	R	52	3	0	0	0	1	0	1	0	2	4	1	1	3
2020	140	1464	8	8C	control	C	94	2	0	0	8	0	0	3	0	0	11	8	8	2
2020	140	1464	8	8R	control	R	214	3	0	0	10	0	0	0	0	0	10	10	10	1
2020	154	1478	8	8C	control	C	870	4	0	0	0	8	0	0	0	1	9	8	8	2
2020	154	1478	8	8R	control	R	2535	2	0	0	11	0	0	0	0	0	11	11	11	1
2020	168	1492	8	8C	control	C	330	3	0	0	1	2	0	0	0	0	3	3	3	2
2020	168	1492	8	8R	control	R	1412	3	5	0	0	0	0	0	0	0	5	5	5	1
2020	182	1506	8	8C	control	C	249	3	0	0	1	1	0	0	0	3	5	2	2	3
2020	182	1506	8	8R	control	R	362	3	0	0	1	0	0	0	0	3	4	1	1	2
2020	195	1519	8	8C	control	C	165	5	0	0	0	0	0	0	0	3	3	0	0	1
2020	195	1519	8	8R	control	R	29	4	0	0	0	0	0	0	0	0	0	0	0	0
2020	213	1537	8	8C	control	C	166	2	0	0	0	0	0	0	0	0	0	0	0	0
2020	213	1537	8	8R	control	R	9	2	0	0	0	0	0	1	0	1	2	0	0	2
2020	223	1547	8	8C	control	C	120	1	0	0	0	1	0	0	1	0	2	2	1	2
2020	238	1562	8	8C	control	C	25	3	0	0	0	0	0	1	0	0	1	0	0	1
2020	238	1562	8	8R	control	R	181	1	0	0	0	0	0	0	0	0	0	0	0	0
2020	252	1576	8	8C	control	C	70	1	0	0	0	0	0	0	0	0	0	0	0	0
2020	252	1576	8	8R	control	R	53	2	0	0	0	0	0	0	0	0	0	0	0	0
2020	266	1590	8	8C	control	C	393	6	4	0	0	0	0	12	2	0	18	6	4	3
2020	266	1590	8	8R	control	R	192	4	0	0	0	0	0	10	2	0	12	2	0	2
2020	280	1604	8	8C	control	C	286	4	58	0	0	4	2	10	4	0	78	68	62	5
2020	280	1604	8	8R	control	R	908	5	38	0	0	7	0	3	0	1	49	45	45	4
2020	295	1619	8	8C	control	C	6412	5	0	0	0	0	0	0	0	0	0	0	0	0
2020	295	1619	8	8R	control	R	2442	3	0	0	0	1	0	0	0	0	1	1	1	1
2020	309	1633	8	8C	control	C	130027	2	0	0	0	0	2	0	0	0	2	2	0	1
2020	309	1633	8	8R	control	R	25572	3	0	0	0	0	0	0	0	0	0	0	0	0
2020	322	1646	8	8C	control	C	1987	3	0	0	0	0	0	0	0	0	0	0	0	0
2020	322	1646	8	8R	control	R	2726	3	0	0	0	1	0	2	0	0	3	1	1	2
2020	69	1393	10	10C	control	C	16	1	0	0	0	0	0	0	0	0	0	0	0	0
2020	69	1393	10	10R	control	R	3	1	0	0	0	0	0	0	0	0	0	0	0	0
2020	83	1407	10	10C	control	C	38	3	0	0	0	0	0	0	0	0	0	0	0	0
2020	83	1407	10	10R	control	R	20	2	0	0	0	0	0	0	0	0	0	0	0	0
2020	99	1423	10	10C	control	C	445	4	0	0	0	0	0	0	0	0	0	0	0	0
2020	99	1423	10	10R	control	R	109	5	0	0	1	1	1	1	0	0	4	3	2	4
2020	113	1437	10	10C	control	C	156	3	0	0	6	0	0	0	0	0	6	6	6	1
2020	113	1437	10	10R	control	R	679	3	0	0	0	10	0	0	6	3	19	16	10	3
2020	126	1450	10	10C	control	C	184	5	0	0	0	0	0	0	0	0	0	0	0	0
2020	126	1450	10	10R	control	R	2251	6	0	0	2	1	0	62	12	1	78	15	3	5
2020	140	1464	10	10C	control	C	88	5	0	0	0	2	0	0	0	1	3	2	2	2
2020	140	1464	10	10R	control	R	138	4	0	0	4	0	0	1	5	0	10	9	4	3
2020	154	1478	10	10C	control	C	193	5	0	0	0	0	0	0	0	0	0	0	0	0
2020	154	1478	10	10R	control	R	91	4	0	0	0	0	0	0	0	0	0	0	0	0
2020	168	1492	10	10C	control	C	568	5	0	0	0	0	0	0	0	0	0	0	0	0
2020	168	1492	10	10R	control	R	172	4	0	0	1	0	0	0	0	0	1	1	1	1
2020	182	1506	10	10C	control	C	1491	3	0	0	0	2	0	0	0	1	3	2	2	2
2020	182	1506	10	10R	control	R	630	1	0	0	0	0	0	2	1	0	3	1	0	2
2020	195	1519	10	10C	control	C	2458	7	0	0	1	2	0	0	0	0	3	3	3	2
2020	195	1519	10	10R	control	R	492	2	0	0	0	1	0	0	0	0	1	1	1	1
2020	213	1537	10	10C	control	C	2754	5	0	0	6	0	0	6	1	0	13	7	6	3
2020	213	1537	10	10R	control	R	741	3	0	0	0	0	0	11	0	0	11	0	0	1
2020	223	1547	10	10C	control	C	774	5	0	0	0	2	0	1	0	0	3	2	2	2
2020	223	1547	10	10R	control	R	414	2	0	0	0	4	0	4	0	0	8	4	4	2
2020	238	1562	10	10C	control	C	1040	3	0	0	0	0	0	0	0	0	0	0	0	0
2020	238	1562	10	10R	control	R	964	5	0	0	0	0	0	1	0	0	1	0	0	1
2020	252	1576	10	10C	control	C	943	6	0	0	0	0	0	2	0	0	2	0	0	1
2020	252	1576	10	10R	control	R	330	3	0	0	0	0	0	0	0	0	0	0	0	0
2020	266	1590	10	10C	control	C	993	9	0	0	0	0	0	2	1	1	4	1	0	3
2020	266	1590	10	10R	control	R	691	4	0	0	0	1	1	0	0	4	6	2	1	3
2020	280	1604	10	10C	control	C	690	5	12	0	0	7	0	4	0	0	23	19	19	3
2020	280	1604	10	10R	control	R	202	3	0	0	0	6	0	0	0	3	9	6	6	2
2020	295	1619	10	10C	control	C	5365	6	3	0	1	6	1	2	0	1	14	11	10	6
2020	295	1619	10	10R	control	R	2431	5	3	0	2	2	3	2	0	1	13	10	7	6
2020	309	1633	10	10C	control	C	276	5	0	0	0	1	0	3	0	10	14	1	1	3
2020	309	1633	10	10R	control	R	106	3	0	0	0	0	0	0	0	0	0	0	0	0
2020	322	1646	10	10C	control	C	4082	3	0	0	0	0	0	0	0	0	0	0	0	0
2020	322	1646	10	10R	control	R	150	2	0	0	0	0	0	0	0	0	0	0	0	0
2020	83	54	2	2C	dormant	C	1	1	0	0	0	0	0	0	0	0	0	0	0	0
2020	83	54	2	2R	dormant	R	10	1	0	0	0	0	0	0	0	0	0	0	0	0
2020	99	70	2	2C	dormant	C	3	1	0	0	0	0	0	0	0	0	0	0	0	0
2020	99	70	2	2R	dormant	R	38	2	0	0	0	0	0	0	0	0	0	0	0	0
2020	113	84	2	2C	dormant	C	351	1	0	0	0	23	0	0	0	48	71	23	23	2
2020	113	84	2	2R	dormant	R	31	2	0	0	2	0	0	0	0	0	2	2	2	1
2020	126	97	2	2C	dormant	C	408	1	0	0	0	0	0	1	2	24	27	2	0	3
2020	126	97	2	2R	dormant	R	464	5	0	0	2	0	0	0	0	1	3	2	2	2
2020	140	111	2	2C	dormant	C	2	1	0	0	0	0	0	0	0	0	0	0	0	0
2020	154	125	2	2R	dormant	R	41	3	0	0	0	3	0	0	0	2	5	3	3	2
2020	168	139	2	2C	dormant	C	4	1	0	0	0	0	0	0	0	0	0	0	0	0
2020	168	139	2	2R	dormant	R	61	2	0	0	0	0	0	0	0	0	0	0	0	0
2020	182	153	2	2C	dormant	C	61	2	0	0	0	0	0	1	0	0	1	0	0	1
2020	182	153	2	2R	dormant	R	68	2	0	0	0	3	0	0	0	0	3	3	3	1
2020	195	166	2	2C	dormant	C	180	2	0	0	0	0	0	0	0	0	0	0	0	0
2020	195	166	2	2R	dormant	R	150	2	0	0	0	0	0	0	0	0	0	0	0	0
2020	213	184	2	2C	dormant	C	64	3	0	0	0	0	0	0	0	0	0	0	0	0
2020	213	184	2	2R	dormant	R	93	2	0	0	0	0	0	0	0	0	0	0	0	0
2020	223	194	2	2C	dormant	C	266	5	0	0	0	0	0	0	0	0	0	0	0	0
2020	223	194	2	2R	dormant	R	198	4	0	0	0	0	1	0	0	0	1	1	0	1
2020	238	209	2	2C	dormant	C	165	2	0	0	0	0	0	0	0	0	0	0	0	0
2020	238	209	2	2R	dormant	R	52	3	0	0	0	0	0	0	0	0	0	0	0	0
2020	252	223	2	2C	dormant	C	81	2	0	0	0	0	0	0	0	0	0	0	0	0
2020	252	223	2	2R	dormant	R	47	3	0	0	0	0	0	0	0	0	0	0	0	0
2020	266	237	2	2C	dormant	C	99	4	0	0	0	0	0	0	0	0	0	0	0	0
2020	266	237	2	2R	dormant	R	57	4	0	0	0	0	0	0	0	0	0	0	0	0
2020	280	251	2	2C	dormant	C	14	3	0	0	0	0	0	0	0	0	0	0	0	0
2020	280	251	2	2R	dormant	R	358	6	0	0	0	0	1	4	0	3	8	1	0	3
2020	295	266	2	2C	dormant	C	53097	4	0	0	0	0	0	0	0	2	2	0	0	1
2020	295	266	2	2R	dormant	R	17985	5	0	0	0	0	0	0	0	1	1	0	0	1
2020	309	280	2	2C	dormant	C	8	1	0	0	0	0	0	0	0	0	0	0	0	0
2020	309	280	2	2R	dormant	R	22	2	0	0	0	0	0	0	0	0	0	0	0	0
2020	322	293	2	2C	dormant	C	13802	1	0	0	0	0	0	0	0	0	0	0	0	0
2020	322	293	2	2R	dormant	R	1194	2	0	0	0	0	0	0	0	0	0	0	0	0
2020	83	54	7	7C	dormant	C	3	1	0	0	0	0	0	0	0	0	0	0	0	0
2020	83	54	7	7R	dormant	R	11	3	0	0	0	0	0	0	0	0	0	0	0	0
2020	99	70	7	7C	dormant	C	69	3	0	0	0	0	0	0	1	6	7	1	0	2
2020	99	70	7	7R	dormant	R	32	4	0	0	0	0	0	0	0	0	0	0	0	0
2020	113	84	7	7C	dormant	C	884	4	0	0	0	50	0	5	3	12	70	53	50	4
2020	113	84	7	7R	dormant	R	200	5	0	0	2	5	1	0	1	0	9	9	7	4
2020	126	97	7	7C	dormant	C	587	6	0	0	0	1	0	17	1	44	63	2	1	4
2020	126	97	7	7R	dormant	R	301	6	0	0	1	10	0	0	0	2	13	11	11	3
2020	140	111	7	7C	dormant	C	88	5	0	0	0	1	0	6	0	0	7	1	1	2
2020	140	111	7	7R	dormant	R	126	3	0	0	0	0	0	0	5	2	7	5	0	2
2020	154	125	7	7C	dormant	C	198	6	0	0	0	0	0	0	3	2	5	3	0	2
2020	154	125	7	7R	dormant	R	353	4	0	0	0	0	0	0	32	0	32	32	0	1
2020	168	139	7	7C	dormant	C	677	5	0	0	0	0	0	0	2	0	2	2	0	1
2020	168	139	7	7R	dormant	R	490	4	0	0	0	3	0	0	3	3	9	6	3	3
2020	182	153	7	7C	dormant	C	1570	4	0	0	0	0	0	0	7	0	7	7	0	1
2020	182	153	7	7R	dormant	R	624	5	0	0	1	10	0	0	0	0	11	11	11	2
2020	195	166	7	7C	dormant	C	997	4	0	0	0	1	1	0	5	0	7	7	1	3
2020	195	166	7	7R	dormant	R	677	4	0	0	0	0	0	0	0	0	0	0	0	0
2020	213	184	7	7C	dormant	C	942	4	0	0	0	0	0	0	0	0	0	0	0	0
2020	213	184	7	7R	dormant	R	799	4	0	0	0	0	0	0	0	0	0	0	0	0
2020	223	194	7	7C	dormant	C	527	2	0	0	0	0	0	3	10	0	13	10	0	2
2020	223	194	7	7R	dormant	R	516	4	0	0	0	0	0	0	13	0	13	13	0	1
2020	238	209	7	7C	dormant	C	895	6	0	0	0	0	0	0	0	0	0	0	0	0
2020	238	209	7	7R	dormant	R	279	4	0	0	0	0	0	0	0	0	0	0	0	0
2020	252	223	7	7C	dormant	C	1474	5	0	0	0	2	6	1	0	4	13	8	2	4
2020	252	223	7	7R	dormant	R	521	8	0	0	1	0	0	0	0	0	1	1	1	1
2020	266	237	7	7C	dormant	C	846	9	0	0	1	6	3	6	0	2	18	10	7	5
2020	266	237	7	7R	dormant	R	559	4	0	0	0	0	0	0	0	0	0	0	0	0
2020	280	251	7	7C	dormant	C	1705	8	17	0	2	0	2	15	0	3	39	21	19	5
2020	280	251	7	7R	dormant	R	725	3	43	0	2	0	0	0	1	2	48	46	45	4
2020	295	266	7	7C	dormant	C	58492.25714	8	0	2	1	0	0	2	1	1	7	4	3	5
2020	295	266	7	7R	dormant	R	41766	6	1	2	0	0	0	0	0	7	10	3	3	3
2020	309	280	7	7C	dormant	C	797	5	0	0	0	0	0	0	0	0	0	0	0	0
2020	309	280	7	7R	dormant	R	51	3	0	0	0	0	0	1	0	0	1	0	0	1
2020	322	293	7	7C	dormant	C	1480	1	0	0	0	0	0	0	0	0	0	0	0	0
2020	322	293	7	7R	dormant	R	1209	2	0	0	0	0	0	0	0	0	0	0	0	0
2020	69	40	9	9C	dormant	C	1	1	0	0	0	0	0	0	0	0	0	0	0	0
2020	83	54	9	9C	dormant	C	8	1	0	0	1	1	0	0	1	0	3	3	2	3
2020	99	70	9	9C	dormant	C	177	6	0	0	0	9	0	0	1	0	10	10	9	2
2020	99	70	9	9R	dormant	R	27	2	0	0	0	0	0	0	0	2	2	0	0	1
2020	113	84	9	9C	dormant	C	510	6	0	0	6	4	0	0	0	8	18	10	10	3
2020	113	84	9	9R	dormant	R	19	4	0	0	4	0	0	0	0	0	4	4	4	1
2020	126	97	9	9C	dormant	C	170	7	0	0	4	0	0	0	2	0	6	6	4	2
2020	126	97	9	9R	dormant	R	276	3	0	0	13	0	1	0	4	0	18	18	13	3
2020	140	111	9	9C	dormant	C	80	2	0	0	6	0	1	0	0	0	7	7	6	2
2020	140	111	9	9R	dormant	R	22	2	0	0	1	0	0	0	0	0	1	1	1	1
2020	154	125	9	9C	dormant	C	140	2	0	0	0	0	0	0	0	0	0	0	0	0
2020	154	125	9	9R	dormant	R	2	1	0	0	0	0	0	0	0	0	0	0	0	0
2020	168	139	9	9C	dormant	C	253	7	1	0	0	2	1	0	0	0	4	4	3	3
2020	168	139	9	9R	dormant	R	114	4	0	0	1	1	1	0	0	0	3	3	2	3
2020	182	153	9	9C	dormant	C	149	7	0	0	0	1	0	0	0	0	1	1	1	1
2020	182	153	9	9R	dormant	R	80	2	0	0	0	0	0	0	0	0	0	0	0	0
2020	195	166	9	9C	dormant	C	181	3	0	0	0	0	0	0	0	0	0	0	0	0
2020	195	166	9	9R	dormant	R	138	5	0	0	0	0	0	0	0	0	0	0	0	0
2020	213	184	9	9C	dormant	C	95	1	0	0	0	0	0	0	0	0	0	0	0	0
2020	213	184	9	9R	dormant	R	115	1	0	0	0	0	0	0	0	0	0	0	0	0
2020	223	194	9	9C	dormant	C	54	3	0	0	2	0	0	0	0	0	2	2	2	1
2020	223	194	9	9R	dormant	R	60	1	0	0	0	4	0	0	0	0	4	4	4	1
2020	238	209	9	9C	dormant	C	272	4	0	0	0	0	2	0	0	1	3	2	0	2
2020	238	209	9	9R	dormant	R	80	1	0	0	0	0	0	0	0	0	0	0	0	0
2020	252	223	9	9C	dormant	C	454	6	0	0	0	0	5	20	1	1	27	6	0	4
2020	252	223	9	9R	dormant	R	153	3	0	0	0	1	0	0	0	0	1	1	1	1
2020	266	237	9	9C	dormant	C	263	6	1	0	0	0	2	3	1	0	7	4	1	4
2020	266	237	9	9R	dormant	R	89	4	0	0	0	0	0	0	0	0	0	0	0	0
2020	280	251	9	9C	dormant	C	1619	6	2	0	0	2	0	6	0	4	14	4	4	4
2020	280	251	9	9R	dormant	R	6430	4	13	0	0	5	0	5	0	4	27	18	18	4
2020	295	266	9	9C	dormant	C	6219	6	1	0	0	1	1	9	0	2	14	3	2	5
2020	295	266	9	9R	dormant	R	3925	4	0	0	0	0	1	0	0	0	1	1	0	1
2020	309	280	9	9C	dormant	C	33	3	0	0	0	0	0	0	0	0	0	0	0	0
2020	309	280	9	9R	dormant	R	31	1	0	0	0	0	0	0	0	0	0	0	0	0
2020	322	293	9	9C	dormant	C	40795	4	0	0	0	0	0	2	0	0	2	0	0	1
2020	322	293	9	9R	dormant	R	21691	2	0	0	0	0	0	0	0	0	0	0	0	0
2020	69	571	4	4C	growing	C	4	1	0	0	0	0	0	0	0	0	0	0	0	0
2020	83	585	4	4C	growing	C	35	2	0	0	0	0	0	0	0	0	0	0	0	0
2020	83	585	4	4R	growing	R	210	1	0	0	0	0	0	0	0	0	0	0	0	0
2020	99	601	4	4C	growing	C	392	2	0	0	0	0	2	0	0	0	2	2	0	1
2020	99	601	4	4R	growing	R	528	3	0	0	4	0	0	0	0	0	4	4	4	1
2020	113	615	4	4C	growing	C	24	2	0	0	3	4	0	1	0	1	9	7	7	4
2020	113	615	4	4R	growing	R	238	3	0	0	4	0	0	0	0	0	4	4	4	1
2020	126	628	4	4C	growing	C	753	3	0	0	0	0	0	0	0	0	0	0	0	0
2020	126	628	4	4R	growing	R	59	3	0	0	4	0	0	0	0	0	4	4	4	1
2020	140	642	4	4C	growing	C	29	2	0	0	2	0	0	0	0	2	4	2	2	2
2020	140	642	4	4R	growing	R	167	3	0	0	8	11	0	0	0	2	21	19	19	3
2020	154	656	4	4C	growing	C	417	3	0	0	4	1	0	0	0	0	5	5	5	2
2020	154	656	4	4R	growing	R	201	2	0	0	7	3	0	0	0	0	10	10	10	2
2020	168	670	4	4C	growing	C	405	2	1	0	0	0	0	0	0	0	1	1	1	1
2020	168	670	4	4R	growing	R	135	1	1	0	0	0	0	0	0	0	1	1	1	1
2020	182	684	4	4C	growing	C	600	1	0	0	0	2	0	0	0	0	2	2	2	1
2020	182	684	4	4R	growing	R	120	2	0	0	0	0	0	0	0	0	0	0	0	0
2020	195	697	4	4C	growing	C	120	1	0	0	0	0	0	0	0	0	0	0	0	0
2020	195	697	4	4R	growing	R	93	3	0	0	0	0	0	0	0	0	0	0	0	0
2020	213	715	4	4C	growing	C	280	1	0	0	0	0	0	0	0	0	0	0	0	0
2020	213	715	4	4R	growing	R	44	1	0	0	0	1	0	0	0	0	1	1	1	1
2020	223	1	4	4C	growing	C	191	2	0	0	0	0	0	0	4	0	4	4	0	1
2020	223	1	4	4R	growing	R	60	1	0	0	0	1	0	3	0	0	4	1	1	2
2020	238	16	4	4C	growing	C	122	2	0	0	0	6	0	0	0	0	6	6	6	1
2020	238	16	4	4R	growing	R	21	2	0	0	0	1	0	0	0	0	1	1	1	1
2020	252	30	4	4C	growing	C	208	2	2	7	0	4	0	1	1	0	15	14	13	5
2020	252	30	4	4R	growing	R	131	4	0	0	0	0	0	0	0	0	0	0	0	0
2020	266	44	4	4C	growing	C	74	5	0	1	0	0	0	0	0	0	1	1	1	1
2020	266	44	4	4R	growing	R	56	3	0	0	0	0	0	0	0	0	0	0	0	0
2020	280	58	4	4C	growing	C	5147	5	7	0	0	1	0	3	0	1	12	8	8	4
2020	280	58	4	4R	growing	R	23	3	0	0	0	0	0	0	0	0	0	0	0	0
2020	295	73	4	4C	growing	C	4627	6	0	6	0	3	0	1	0	0	10	9	9	3
2020	295	73	4	4R	growing	R	208	6	0	0	0	0	0	0	0	0	0	0	0	0
2020	309	87	4	4C	growing	C	80415	2	0	0	0	0	0	0	0	0	0	0	0	0
2020	309	87	4	4R	growing	R	128	5	1	0	0	1	0	0	0	0	2	2	2	2
2020	322	100	4	4C	growing	C	20	2	0	0	0	0	0	0	0	0	0	0	0	0
2020	322	100	4	4R	growing	R	200	1	0	0	0	0	0	0	0	0	0	0	0	0
2020	69	571	6	6C	growing	C	4	1	0	0	0	0	0	0	0	0	0	0	0	0
2020	83	585	6	6R	growing	R	29	1	0	0	0	0	0	0	0	0	0	0	0	0
2020	99	601	6	6C	growing	C	133	4	0	0	7	0	3	0	0	0	10	10	7	2
2020	113	615	6	6C	growing	C	68	3	0	0	0	0	5	1	0	0	6	5	0	2
2020	126	628	6	6C	growing	C	8	3	0	0	0	0	0	0	0	0	0	0	0	0
2020	126	628	6	6R	growing	R	38	3	0	0	0	1	0	0	0	2	3	1	1	2
2020	140	642	6	6C	growing	C	37	3	0	0	5	0	0	0	0	4	9	5	5	2
2020	140	642	6	6R	growing	R	21	2	0	0	5	0	0	0	0	2	7	5	5	2
2020	154	656	6	6C	growing	C	320	2	0	0	0	0	0	0	0	0	0	0	0	0
2020	154	656	6	6R	growing	R	40	2	0	0	0	0	0	0	0	0	0	0	0	0
2020	168	670	6	6C	growing	C	577	3	0	0	2	2	0	0	0	5	9	4	4	3
2020	168	670	6	6R	growing	R	376	2	0	0	1	4	0	0	0	0	5	5	5	2
2020	182	684	6	6C	growing	C	2020	2	0	0	0	0	0	0	1	0	1	1	0	1
2020	182	684	6	6R	growing	R	482	2	0	0	2	2	0	0	0	0	4	4	4	2
2020	195	697	6	6C	growing	C	1350	1	0	0	0	1	0	0	0	0	1	1	1	1
2020	195	697	6	6R	growing	R	630	2	0	0	0	1	0	0	0	0	1	1	1	1
2020	213	715	6	6C	growing	C	1252	2	0	0	0	1	0	4	15	0	20	16	1	3
2020	213	715	6	6R	growing	R	916	3	0	0	2	0	0	7	2	0	11	4	2	3
2020	223	1	6	6C	growing	C	2150	1	0	0	0	1	0	2	3	2	8	4	1	4
2020	223	1	6	6R	growing	R	741	2	0	0	0	0	0	4	3	0	7	3	0	2
2020	238	16	6	6C	growing	C	501	2	0	0	0	0	0	0	0	0	0	0	0	0
2020	238	16	6	6R	growing	R	376	2	0	0	0	0	0	0	0	0	0	0	0	0
2020	252	30	6	6C	growing	C	370	1	0	0	0	0	0	0	0	0	0	0	0	0
2020	252	30	6	6R	growing	R	231	1	0	0	0	0	0	0	0	0	0	0	0	0
2020	266	44	6	6C	growing	C	1551	3	0	0	0	0	0	0	0	0	0	0	0	0
2020	266	44	6	6R	growing	R	1013	3	0	0	0	2	0	0	0	0	2	2	2	1
2020	280	58	6	6C	growing	C	881	5	0	0	1	3	0	1	0	0	5	4	4	3
2020	280	58	6	6R	growing	R	502	3	0	0	0	0	0	0	0	1	1	0	0	1
2020	295	73	6	6C	growing	C	59186	5	0	0	0	0	0	0	0	10	10	0	0	1
2020	295	73	6	6R	growing	R	12435	4	0	0	0	0	0	0	0	0	0	0	0	0
2020	309	87	6	6C	growing	C	5149	3	0	0	0	7	2	2	0	31	42	9	7	4
2020	309	87	6	6R	growing	R	2852	2	0	0	0	1	0	0	0	16	17	1	1	2
2020	322	100	6	6C	growing	C	11435	3	0	0	0	0	0	0	0	2	2	0	0	1
2020	322	100	6	6R	growing	R	15770	2	0	0	0	0	0	0	0	1	1	0	0	1
2020	69	571	11	11C	growing	C	15	3	0	0	0	0	0	0	0	0	0	0	0	0
2020	69	571	11	11R	growing	R	12	1	0	0	0	0	0	0	0	0	0	0	0	0
2020	83	585	11	11C	growing	C	82	1	0	0	0	0	0	0	0	0	0	0	0	0
2020	83	585	11	11R	growing	R	19	3	0	0	0	0	0	0	0	0	0	0	0	0
2020	99	601	11	11C	growing	C	162	4	0	0	3	0	0	0	0	1	4	3	3	2
2020	99	601	11	11R	growing	R	21	3	0	0	4	0	0	1	0	0	5	4	4	2
2020	113	615	11	11C	growing	C	93	6	0	0	0	1	0	2	0	0	3	1	1	2
2020	113	615	11	11R	growing	R	222	2	0	0	0	2	0	1	0	1	4	2	2	3
2020	126	628	11	11C	growing	C	146	5	0	0	2	2	0	2	0	22	28	4	4	4
2020	126	628	11	11R	growing	R	62	6	0	0	0	0	0	0	0	1	1	0	0	1
2020	140	642	11	11C	growing	C	15	2	0	0	0	0	8	0	0	0	8	8	0	1
2020	140	642	11	11R	growing	R	29	4	0	0	0	0	0	3	0	9	12	0	0	2
2020	154	656	11	11C	growing	C	213	4	0	0	0	0	0	0	0	3	3	0	0	1
2020	154	656	11	11R	growing	R	362	2	0	0	0	1	0	0	0	0	1	1	1	1
2020	168	670	11	11C	growing	C	392	3	0	0	0	0	0	0	0	0	0	0	0	0
2020	168	670	11	11R	growing	R	500	1	0	0	0	0	0	0	0	1	1	0	0	1
2020	182	684	11	11C	growing	C	1143	3	0	0	0	0	0	0	1	0	1	1	0	1
2020	182	684	11	11R	growing	R	267	4	1	0	0	0	0	0	0	0	1	1	1	1
2020	195	697	11	11C	growing	C	824	3	0	0	0	1	0	0	0	0	1	1	1	1
2020	195	697	11	11R	growing	R	204	5	0	0	0	8	0	0	0	0	8	8	8	1
2020	213	715	11	11C	growing	C	364	2	0	0	0	0	0	2	0	0	2	0	0	1
2020	213	715	11	11R	growing	R	100	1	0	0	0	0	0	5	0	0	5	0	0	1
2020	223	1	11	11C	growing	C	359	2	0	0	0	3	0	1	0	0	4	3	3	2
2020	223	1	11	11R	growing	R	219	2	0	0	0	0	0	0	0	0	0	0	0	0
2020	238	16	11	11C	growing	C	179	3	0	0	0	1	0	0	0	0	1	1	1	1
2020	238	16	11	11R	growing	R	130	1	0	0	0	3	0	0	0	0	3	3	3	1
2020	252	30	11	11C	growing	C	73	4	0	0	0	0	0	0	0	0	0	0	0	0
2020	252	30	11	11R	growing	R	210	1	0	0	0	0	0	0	0	0	0	0	0	0
2020	266	44	11	11C	growing	C	45	3	0	0	0	0	0	0	0	0	0	0	0	0
2020	266	44	11	11R	growing	R	344	4	0	0	0	0	0	1	0	0	1	0	0	1
2020	280	58	11	11C	growing	C	5385	6	3	0	0	2	0	4	1	3	13	6	5	5
2020	280	58	11	11R	growing	R	6278	6	34	0	0	3	0	4	0	2	43	37	37	4
2020	295	73	11	11C	growing	C	16290	4	0	0	0	0	0	1	0	0	1	0	0	1
2020	295	73	11	11R	growing	R	3698	4	0	0	0	0	0	1	0	0	1	0	0	1
2020	322	100	11	11C	growing	C	970	3	0	0	0	0	0	0	0	0	0	0	0	0
2020	322	100	11	11R	growing	R	853	2	0	0	0	0	0	0	0	0	0	0	0	0
2020	83	668	3	3R	transition	R	50	2	0	0	0	0	0	0	0	0	0	0	0	0
2020	99	684	3	3R	transition	R	69	2	0	0	0	0	0	0	0	1	1	0	0	1
2020	113	698	3	3C	transition	C	5	1	0	0	0	0	0	0	0	0	0	0	0	0
2020	113	698	3	3R	transition	R	94	3	0	0	0	0	0	0	0	2	2	0	0	1
2020	126	711	3	3C	transition	C	1	1	0	0	0	0	0	0	0	0	0	0	0	0
2020	126	711	3	3R	transition	R	17	2	0	0	0	1	0	62	0	3	66	1	1	3
2020	154	739	3	3C	transition	C	349	3	0	0	0	0	0	1	0	0	1	0	0	1
2020	154	739	3	3R	transition	R	62	2	0	0	2	0	1	0	0	0	3	3	2	2
2020	168	753	3	3C	transition	C	458	4	0	0	0	0	1	0	0	0	1	1	0	1
2020	168	753	3	3R	transition	R	80	3	0	0	0	0	0	0	1	0	1	1	0	1
2020	182	12	3	3C	transition	C	2055	2	0	0	0	0	0	0	0	0	0	0	0	0
2020	182	12	3	3R	transition	R	289	2	0	0	0	0	0	0	0	0	0	0	0	0
2020	195	25	3	3C	transition	C	795	4	0	0	0	6	0	4	0	1	11	6	6	3
2020	195	25	3	3R	transition	R	198	3	0	0	0	0	6	0	0	0	6	6	0	1
2020	213	43	3	3C	transition	C	658	3	0	0	0	0	4	0	0	0	4	4	0	1
2020	213	43	3	3R	transition	R	73	2	0	0	0	0	0	2	0	0	2	0	0	1
2020	223	53	3	3C	transition	C	1404	4	0	0	0	0	0	0	0	0	0	0	0	0
2020	223	53	3	3R	transition	R	333	2	0	0	0	3	0	0	0	0	3	3	3	1
2020	238	68	3	3C	transition	C	1713	4	0	0	0	0	0	0	0	0	0	0	0	0
2020	238	68	3	3R	transition	R	468	3	0	0	0	0	0	0	0	0	0	0	0	0
2020	252	82	3	3C	transition	C	546	3	0	0	0	5	0	0	0	0	5	5	5	1
2020	252	82	3	3R	transition	R	328	4	0	0	0	0	1	1	0	0	2	1	0	2
2020	266	96	3	3C	transition	C	714	4	0	0	0	0	0	0	0	0	0	0	0	0
2020	266	96	3	3R	transition	R	207	4	0	0	0	0	0	0	0	0	0	0	0	0
2020	280	110	3	3C	transition	C	33873	5	0	0	0	0	0	60	0	6	66	0	0	2
2020	280	110	3	3R	transition	R	10669	4	0	0	2	0	0	0	0	1	3	2	2	2
2020	295	125	3	3C	transition	C	179825	5	0	0	0	0	0	0	0	0	0	0	0	0
2020	295	125	3	3R	transition	R	23912	3	0	0	0	0	0	0	0	1	1	0	0	1
2020	309	139	3	3C	transition	C	90000	1	0	0	0	0	0	0	0	0	0	0	0	0
2020	309	139	3	3R	transition	R	8052	1	0	0	0	0	0	0	0	0	0	0	0	0
2020	322	152	3	3C	transition	C	1556	3	0	0	0	0	0	0	0	0	0	0	0	0
2020	322	152	3	3R	transition	R	255	2	0	0	0	0	0	0	0	0	0	0	0	0
2020	69	654	5	5R	transition	R	9	1	0	0	0	0	0	0	0	0	0	0	0	0
2020	83	668	5	5C	transition	C	111	2	0	0	0	0	0	0	0	0	0	0	0	0
2020	83	668	5	5R	transition	R	9	2	0	0	0	0	0	0	0	0	0	0	0	0
2020	99	684	5	5C	transition	C	342	3	0	0	0	0	0	0	2	0	2	2	0	1
2020	99	684	5	5R	transition	R	60	3	2	0	1	1	0	0	0	1	5	4	4	4
2020	113	698	5	5C	transition	C	89	2	0	0	0	0	0	0	0	0	0	0	0	0
2020	113	698	5	5R	transition	R	78	4	0	0	3	0	0	0	0	1	4	3	3	2
2020	126	711	5	5C	transition	C	4	1	0	0	2	0	0	0	0	2	4	2	2	2
2020	126	711	5	5R	transition	R	77	3	0	0	7	1	0	0	0	0	8	8	8	2
2020	140	725	5	5R	transition	R	148	2	0	0	6	9	0	0	0	0	15	15	15	2
2020	154	739	5	5C	transition	C	855	1	0	0	0	0	0	0	0	1	1	0	0	1
2020	154	739	5	5R	transition	R	791	4	0	0	6	0	0	0	1	0	7	7	6	2
2020	168	753	5	5C	transition	C	40	2	0	0	1	0	0	0	0	0	1	1	1	1
2020	168	753	5	5R	transition	R	893	4	5	0	0	1	0	0	0	0	6	6	6	2
2020	182	12	5	5C	transition	C	240	1	0	0	0	0	0	0	0	4	4	0	0	1
2020	182	12	5	5R	transition	R	1138	3	1	0	0	6	0	0	0	5	12	7	7	3
2020	195	25	5	5C	transition	C	84	1	0	0	0	0	0	0	0	0	0	0	0	0
2020	195	25	5	5R	transition	R	1320	1	0	0	0	0	0	0	0	0	0	0	0	0
2020	213	43	5	5R	transition	R	2790	1	0	0	0	0	0	0	0	0	0	0	0	0
2020	223	53	5	5R	transition	R	270	1	0	0	0	0	0	0	0	0	0	0	0	0
2020	238	68	5	5R	transition	R	277	1	0	0	0	0	0	4	0	0	4	0	0	1
2020	252	82	5	5R	transition	R	1751	2	0	0	0	2	0	1	0	0	3	2	2	2
2020	266	96	5	5C	transition	C	28	1	0	0	0	0	0	0	0	1	1	0	0	1
2020	266	96	5	5R	transition	R	791	5	0	0	0	0	1	3	0	2	6	1	0	3
2020	280	110	5	5C	transition	C	19796	4	6	0	0	0	0	41	0	1	48	6	6	3
2020	280	110	5	5R	transition	R	1811	5	35	1	0	0	1	10	13	1	61	50	36	6
2020	295	125	5	5C	transition	C	14892	2	0	0	0	0	0	0	0	0	0	0	0	0
2020	295	125	5	5R	transition	R	8276	5	0	0	0	0	0	0	0	0	0	0	0	0
2020	309	139	5	5C	transition	C	35390	2	0	0	0	0	0	0	0	0	0	0	0	0
2020	309	139	5	5R	transition	R	9025	3	0	0	0	0	0	1	0	0	1	0	0	1
2020	322	152	5	5C	transition	C	864	2	0	0	0	0	0	0	0	0	0	0	0	0
2020	322	152	5	5R	transition	R	1493	3	0	0	0	0	0	0	0	0	0	0	0	0
2020	69	654	12	12C	transition	C	6	1	0	0	0	0	0	0	0	0	0	0	0	0
2020	69	654	12	12R	transition	R	5	2	0	0	0	0	0	0	0	0	0	0	0	0
2020	83	668	12	12C	transition	C	75	3	0	0	0	0	0	0	0	0	0	0	0	0
2020	83	668	12	12R	transition	R	15	2	0	0	0	0	0	0	0	0	0	0	0	0
2020	99	684	12	12C	transition	C	97	3	0	0	3	0	1	1	1	0	6	5	3	4
2020	99	684	12	12R	transition	R	179	4	0	0	1	3	0	0	1	3	8	5	4	4
2020	113	698	12	12C	transition	C	54	3	0	0	0	1	0	1	0	0	2	1	1	2
2020	113	698	12	12R	transition	R	22	1	0	0	0	0	0	0	0	0	0	0	0	0
2020	126	711	12	12C	transition	C	290	2	0	0	0	0	0	34	0	0	34	0	0	1
2020	126	711	12	12R	transition	R	2246	3	0	0	0	7	0	142	0	9	158	7	7	3
2020	140	725	12	12C	transition	C	6	3	0	0	1	0	0	0	0	0	1	1	1	1
2020	140	725	12	12R	transition	R	2	1	0	0	1	0	0	0	0	0	1	1	1	1
2020	154	739	12	12C	transition	C	92	3	0	0	0	1	0	0	0	1	2	1	1	2
2020	154	739	12	12R	transition	R	1162	4	3	0	0	0	0	0	1	2	6	4	3	3
2020	168	753	12	12C	transition	C	590	5	0	0	0	3	0	0	0	0	3	3	3	1
2020	168	753	12	12R	transition	R	1060	2	0	0	0	0	0	0	0	0	0	0	0	0
2020	182	12	12	12C	transition	C	120	1	0	0	0	5	0	0	0	0	5	5	5	1
2020	182	12	12	12R	transition	R	528	2	0	0	0	2	0	0	0	0	2	2	2	1
2020	195	25	12	12C	transition	C	64	2	0	0	0	0	0	0	0	0	0	0	0	0
2020	195	25	12	12R	transition	R	108	2	0	0	0	0	0	0	0	0	0	0	0	0
2020	213	43	12	12C	transition	C	96	2	0	0	0	0	0	1	0	0	1	0	0	1
2020	213	43	12	12R	transition	R	215	1	0	0	0	0	0	0	0	0	0	0	0	0
2020	223	53	12	12C	transition	C	40	1	0	0	0	6	0	0	0	0	6	6	6	1
2020	223	53	12	12R	transition	R	1023	2	0	0	0	10	0	0	6	1	17	16	10	3
2020	238	68	12	12C	transition	C	239	4	0	0	0	0	0	0	2	0	2	2	0	1
2020	238	68	12	12R	transition	R	101	2	0	0	0	1	0	0	0	0	1	1	1	1
2020	252	82	12	12C	transition	C	90	1	0	0	0	0	0	0	0	0	0	0	0	0
2020	252	82	12	12R	transition	R	640	3	0	0	0	0	0	0	0	0	0	0	0	0
2020	266	96	12	12C	transition	C	30	1	0	0	0	6	0	0	0	0	6	6	6	1
2020	266	96	12	12R	transition	R	271	4	0	0	0	2	0	0	0	0	2	2	2	1
2020	280	110	12	12C	transition	C	34	4	0	0	0	0	0	0	0	0	0	0	0	0
2020	280	110	12	12R	transition	R	178	4	0	0	0	0	0	0	0	0	0	0	0	0
2020	295	125	12	12C	transition	C	5564	2	0	0	0	0	0	2	0	0	2	0	0	1
2020	295	125	12	12R	transition	R	426	5	0	0	0	0	0	0	0	0	0	0	0	0
2020	309	139	12	12C	transition	C	84065	5	0	0	0	10	0	1	0	0	11	10	10	2
2020	309	139	12	12R	transition	R	8420	5	0	0	0	12	5	2	0	0	19	17	12	3
2020	322	152	12	12C	transition	C	4802	2	0	0	0	0	0	0	0	0	0	0	0	0
2020	322	152	12	12R	transition	R	4495	2	0	0	0	0	0	0	0	0	0	0	0	0
